# Supplementary material for: The Ionomic Study of Vegetable Crops
Source: PubMed Central journal article supplement (PMC4968822; doi:10.1371/journal.pone.0160273), 2016-08-01
Supplement: pone.0160273.s001.pdf [file pone.0160273.s001.pdf]

S1 Table. Chemical properties of the field soils used in this study<sup>a</sup>.

| K ( $\mu\text{g g}^{-1}$ ) | Truog P ( $\mu\text{g g}^{-1}$ ) | Ca ( $\mu\text{g g}^{-1}$ ) | Mg ( $\mu\text{g g}^{-1}$ ) | Fe ( $\mu\text{g g}^{-1}$ ) | Mn ( $\mu\text{g g}^{-1}$ ) | B               | Zn ( $\mu\text{g g}^{-1}$ ) | Cu ( $\mu\text{g g}^{-1}$ ) | Mo ( $\text{ng g}^{-1}$ ) | Ni ( $\text{ng g}^{-1}$ ) | Li ( $\text{ng g}^{-1}$ ) | Na ( $\mu\text{g g}^{-1}$ ) |
|----------------------------|----------------------------------|-----------------------------|-----------------------------|-----------------------------|-----------------------------|-----------------|-----------------------------|-----------------------------|---------------------------|---------------------------|---------------------------|-----------------------------|
| 362 $\pm$ 9                | 181 $\pm$ 10                     | 2153 $\pm$ 60               | 225 $\pm$ 5                 | 2.78 $\pm$ 0.33             | 10.0 $\pm$ 1.1              | ND <sup>b</sup> | 0.796 $\pm$ 0.115           | 27.6 $\pm$ 7.5              | 11.0 $\pm$ 0.4            | 85.4 $\pm$ 4.4            | 34.8 $\pm$ 2.0            | 23.4 $\pm$ 0.9              |

  

| Al ( $\mu\text{g g}^{-1}$ ) | V ( $\text{ng g}^{-1}$ ) | Cr ( $\text{ng g}^{-1}$ ) | Co ( $\text{ng g}^{-1}$ ) | As ( $\text{ng g}^{-1}$ ) | Se ( $\text{ng g}^{-1}$ ) | Rb | Sr ( $\mu\text{g g}^{-1}$ ) | Cd ( $\text{ng g}^{-1}$ ) | Cs ( $\mu\text{g g}^{-1}$ ) | Ba ( $\mu\text{g g}^{-1}$ ) | pH (H <sub>2</sub> O) |
|-----------------------------|--------------------------|---------------------------|---------------------------|---------------------------|---------------------------|----|-----------------------------|---------------------------|-----------------------------|-----------------------------|-----------------------|
| 2.89 $\pm$ 0.23             | 3.55 $\pm$ 0.21          | 224 $\pm$ 8               | 17.4 $\pm$ 1.3            | 30.2 $\pm$ 0.8            | 5.12 $\pm$ 0.70           | ND | 9.15 $\pm$ 0.17             | 33.7 $\pm$ 1.2            | 0.496 $\pm$ 0.062           | 17.7 $\pm$ 0.3              | 5.43 $\pm$ 0.02       |

<sup>a</sup>Concentration of elements except for P were determined by ammonium acetate extraction. Available P concentration was determined by Truog method. Soil pH was determined by using a 1 : 2.5 soil to water ratio using pH meter. See Watanabe et al. (2015) for details.

<sup>b</sup>Not determined
