# Supplementary material for: The Ionomic Study of Vegetable Crops
Source: PubMed Central journal article supplement (PMC4968822; doi:10.1371/journal.pone.0160273), 2016-08-01
Supplement: pone.0160273.s002.pdf [file pone.0160273.s002.pdf]

S2 Table. Average mineral concentration ( $\text{mg g}^{-1}$ ) of each element in leaves of Komatsuna4 in 2011 and 2012.

|      | K    | P    | Ca   | Mg   | Fe    | Mn     | B      | Zn    | Cu      | Ni      | Na   | Al     | Cd       | Sr     |
|------|------|------|------|------|-------|--------|--------|-------|---------|---------|------|--------|----------|--------|
| 2011 | 58.4 | 6.35 | 28.2 | 3.48 | 0.107 | 0.0380 | 0.0197 | 0.110 | 0.00648 | 0.00101 | 2.00 | 0.0450 | 0.000240 | 0.0992 |
| 2012 | 53.8 | 7.05 | 24.1 | 3.35 | 0.132 | 0.0382 | 0.0241 | 0.114 | 0.00663 | 0.00117 | 2.09 | 0.0306 | 0.000504 | 0.0805 |
